# Supplementary material
Source: publisher site journal article supplement (https://www.dovepress.com/article/414056)
Supplement: Supplementary file 1 [file get_supplementary_file.php]

**Appendix A:**

*Search strategy for MEDLINE using the OVID platform detailed below:*

Concept 1: Rib fracture

1. MeSH term search – rib fractures
2. MeSH term search – thoracic injuries
3. MeSH term search – flail chest
4. Keyword search – (rib OR chest OR thora*) adj2 (fracture* OR trauma* OR injur*)
5. Keyword search – (broke* or break*) adj2 rib*
6. 1 OR 2 OR 3 OR 4 OR 5

Concept 2: Erector spinae block

1. MeSH term search – Anaesthesia, local
2. MeSH term search – Nerve block
3. MeSH term search – Pain Management
4. Keyword search – (erector spinae adj3 block)
5. Keyword search – (ESB OR ESP OR ESPB)
6. 7 OR 8 OR 9 OR 10 OR 11

Combination search line:

1. 6 AND 12
